# Supplementary material for: The airway microbiota and exacerbations of COPD
Source: PubMed Central journal article supplement — ERJ Open Res. 2020 Aug 31;6(3):00168-2020. doi: 10.1183/23120541.00168-2020 (PMC7456643; doi:10.1183/23120541.00168-2020), 2020-08-31
Supplement: 00168-2020.supp.pdf [file 00168-2020.supp.pdf]

# Supplementary material

## The airway microbiota and exacerbations of COPD

Elise Orvedal Leiten<sup>1</sup>, Rune Nielsen<sup>1,2</sup>, Harald Gotten Wiker<sup>1,3</sup>, Per Sigvald Bakke<sup>1</sup>, Einar

Marius Hjellestad Martinsen<sup>1</sup>, Christine Drengenes<sup>1,2</sup>, Solveig Tangedal<sup>1,2</sup>, Gunnar Reksten

Husebø<sup>1,2</sup>, Tomas Mikal Lind Eagan<sup>1,2</sup>

### Affiliations:

<sup>1</sup>Department of Clinical Science, University of Bergen

<sup>2</sup>Department of Thoracic Medicine, Haukeland University Hospital, Bergen

<sup>3</sup>Department of Microbiology, Haukeland University Hospital, Bergen

## **Methodological considerations**

### *Collection of the microbial samples.*

In the current study, we explore the lower airways microbiome by two different sampling methods, sterile brushes and protected bronchoalveolar lavage (BAL). Both methods have advantages and weaknesses, and therefore may enhance each other when both are employed.

When a bronchoscope is inserted through the upper airways, invariably the tip of the bronchoscope will come into contact with the upper airways' microbiome. We employed no suction prior to placement with the bronchoscope below the vocal cords, yet even though there is no 100% avoidance of contaminating the working channel from the microbiome that may have attached itself on the tip of the bronchoscope during the passage through the upper airways.

However, the protected specimen brushes will be truly sterile if handled correctly, since they have a wax sealed tip which can be released once the brush is visually in safe distance from the bronchoscope tip, and then be applied by visual inspection in the bronchi. The brush shall then be retracted to safe distance within their plastic sheet covering by visual guidance before pulling out, and the brush tip must be cut by sterile scissors into a sterile tube, as was done in the current study, and rarely reported upon in detail by others. The main problem with the brushes is that the area sampled is distinct but small, and the biomass per one brush tends to be very small. To mitigate this, we used three brushes in each patient at each sampling site, and each brush was brushed ten times back and forth without excessive force, at each sampling site.

Sampling BAL offers the advantage of obtaining microbial biomass from a much larger geographical area of a bronchial tree, and also, unrelated to the current analyses, the potential for fluid for biomarker analyses and differential cell counts.

However, BAL have contamination issues, especially if one merely installs the fluid through the working channel, likely contaminated by previous suctioning, and not usually fully sterile by regular scope washing procedures. We used a sterile (Combicath) inner catheter with a sealed tip to install the fluid. Even though, our BAL procedure can still not be 100% sterile by design, since when the fluid is instilled, some minute amounts of fluid will touch the tip of the bronchoscope, and thus possibly be contaminated. Another potential issue with BAL is yield. Although a controlled similar amount of fluid may be installed, yield will vary between patients. Especially in patients with a large degree of emphysema, much more fluid is "lost" to the periphery, and not returned. How to correct for this is uncertain, as the effects on the concentration of microbial mass is uncertain. Like other researchers before us, we choose not to attempt any adjustment for yield. This potential problem is presumably absent with the use of brushes, however there is invariably variation of force and length of each brushing, for each patient and each bronchoscopist, illustrating that no sampling method can be 100% standardized.

#### *Control samples*

Each bronchoscopy day, we opened a new, sealed, sterile 500mL Phosphate Buffered Saline (PBS) bottle. From this bottle, PBS was drawn with sterile syringes, used for BAL sampling, the fluid used for Oral wash sampling, and also the fluid in which the sterile brushes were immersed in sterile tubes. Also, we collected small amounts of this fluid in sterile tubes and froze them. These latter samples were our negative control samples. Thus, the negative

controls are PBS fluid - which all other samples will have been in contact with - but clean from the sterile bottle - the very same bottle all sample fluids were drawn from. For every single procedure in each examined participant, we thus have a negative control sample available for microbial sequencing. Sequencing the negative controls enabled us to assess sequences which must be considered contaminants, since they either must have been acquired from the PBS bottle, or from the laboratory handling. These negative control samples were extremely useful for the Decontam algorithm, allowing the use of the prevalence-based method. We have previously examined in detail the possible contamination in the MicroCOPD study, showing the usefulness of these negative control samples [1].

#### *Further details on data curation*

All samples in our prediction of exacerbation analysis belong to the larger MicroCOPD study, collected with an identical protocol, and thus likely to see the same sampling and laboratory related contaminants, in addition to other study-wide phenomena such as index bleeding. The samples were analysed on one MiSeq instrument, however over different 30 runs due to the large number of samples (>2500). Since the quality scores will differ for the different runs, and the Divisive Amplicon Denoising Algorithm version 2 (DADA2) algorithm uses the quality scores for the denoising, DADA2 requires that each run is imported and denoised separately before merging. In addition to specifying the minimum phred score per base, the DADA2 relies on visual inspection of the quality plot of the forward and reverse reads, and then deciding where to cut the forward and reverse reads per run. Invariably, this is subjective to the eye of the beholder, and somewhat arbitrary over 30 runs.

Thus, we chose to pre-trim the sequences by the software tool Trimmomatic (v0.39) [2],

using the following parameters:

```
-phred33, and algorithm: HEADCROP:17:300:21:300 LEADING:20 TRAILING:25  
SLIDINGWINDOW:4:20 MINLEN:220.
```

The HEADCROP:17:300:21:300 ensures the primers which were 17 bp forward and 21 bp reverse were removed. Since quality was regularly lower for the very first as well as the tail end of the reads, LEADING and TRAILING were set to 20 and 25 respectively. SLIDING WINDOW represents the possibility not present in DADA2, effectively picking out low quality reads within the middle range of the reads. However, the main advantage to using Trimmomatic in our study was to ensure all runs were treated exactly the same regarding quality requirements.

After this trimming, each of the 30 runs were imported into QIIME 2 (v2018.8) and denoised with DADA2, using the command:

```
qiime dada2 denoise-paired --i-demultiplexed-seqs  
/Volumes/.../RUNX_workingfiles/RUNX_importdemux/RUNXimport-trimmed-demux.qza  
--output-dir /Volumes/LaCie/RUN6_workingfiles/RUNX_denoisedpaired  
--p-trunc-len-f 0 --p-trunc-len-r 0 --p-trim-left-f 0 --p-trim-left-r 0  
[already trimmed by trimmomatic]  
--p-chimera-method consensus
```

And after that the files from the 30 runs were merged, before another round of chimera removal using VSEARCH.

#### *Handling of contamination using information from the control samples*

In order to do effective contamination removal, taking into account all samples in the relevant runs, we kept all samples as long as possible in the up-stream processing. After the

steps described above, the ASV table was exported for use in R (v3.4.1) with the Decontam algorithm (v1.1.2) [3].

We chose the prevalence method which is advised for low-biomass samples such as ours, and where the contaminants are identified by increased prevalence in negative controls relative to the true biological samples. A key parameter is the threshold parameter, which is the probability threshold below which a contaminant should be rejected in favor of a non-contaminant. After running the algorithm, frequency distribution plots can be run to assess how well the contaminants and non-contaminants are distinguished between each other.

We ran Decontam with thresholds 0.3, 0.4 and 0.5, and found that a threshold of 0.3 struck the best balance between distinguishing likely contaminants, and retaining likely non-contaminant reads. With threshold = 0.3, we identified 280 ASVs deemed likely contaminants.

To see how the negative controls differed from the biological samples, we provide principal coordinate analysis (PCoA) plots with Bray-Curtis, weighted and unweighted UniFrac distances, showing the clustering of samples before the Decontam step (Supplementary figures 1-3).

**Supplementary figure 1:** Bray-Curtis distances between airway samples and negative control samples. Samples in this figure are from the participants in this study, before the Decontam step and rarefied to a sampling depth of 1000 before diversity analyses. OW: Oral wash, rPSB: Right protected specimen brushes, BAL 2: Second fraction of bronchoalveolar lavage, NCS: Negative control samples.

## Bray-Curtis distance

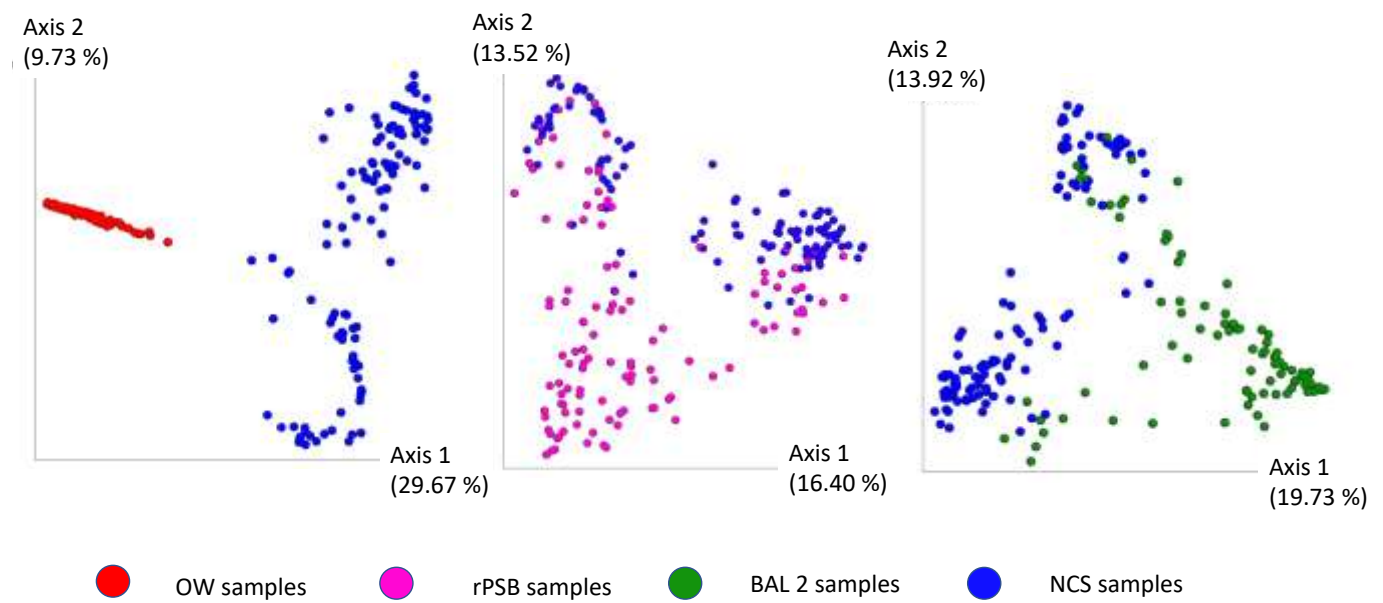

**Supplementary figure 2:** Weighted UniFrac distances between airway samples and negative control samples. Samples in this figure are from the participants in this study, before the Decontam step and rarefied to a sampling depth of 1000 before diversity analyses. OW: Oral wash, rPSB: Right protected specimen brushes, BAL 2: Second fraction of bronchoalveolar lavage, NCS: Negative control samples.

### Weighted UniFrac distance

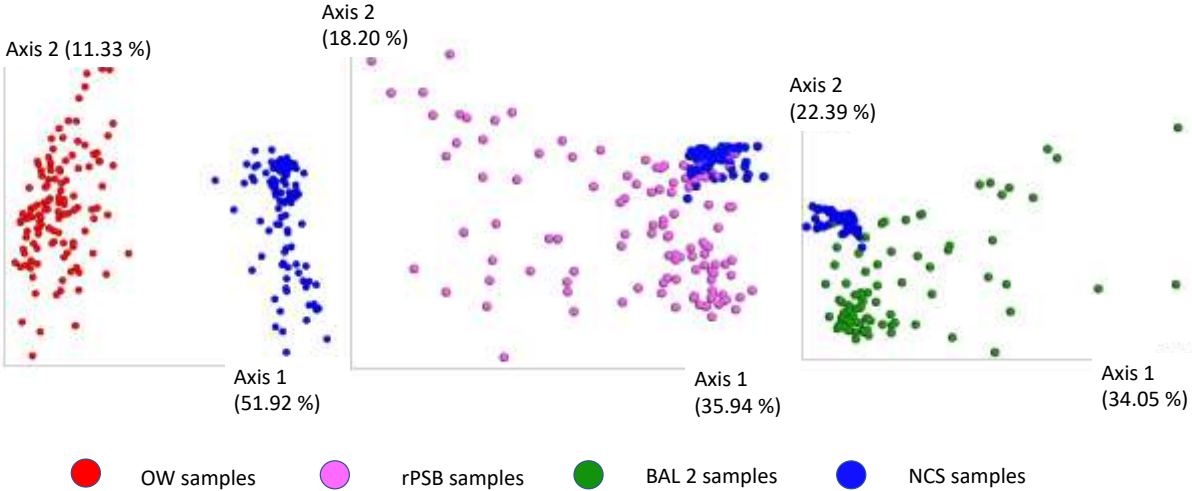



**Supplementary figure 3:** Unweighted UniFrac distances between airway samples and negative control samples. Samples in this figure are from the participants in this study, before the Decontam step and rarefied to a sampling depth of 1000 before diversity analyses. OW: Oral wash, rPSB: Right protected specimen brushes, BAL 2: Second fraction of bronchoalveolar lavage, NCS: Negative control samples.

## Unweighted UniFrac distance

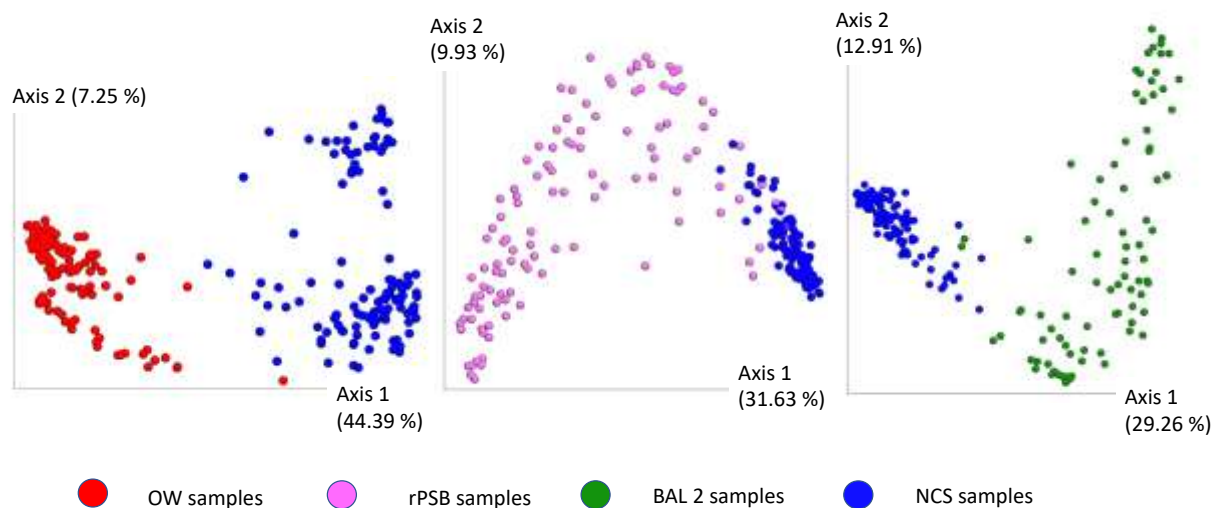

When collapsed to the genus level (not all could be assigned taxonomy at the genus level), the number of separate taxa was 82. These 82 taxa are listed below. Taxa are ordered according to their relative abundance among identified contaminants across all samples, in increasing order:

g\_\_Neisseriaceae\_[G-1]  
g\_\_Veillonellaceae\_[G-1]  
p\_\_Bacteroidetes;\_\_;\_\_;\_\_  
g\_\_Clostridiales\_[F-3][G-1]  
g\_\_Lactococcus  
g\_\_Caulobacter  
g\_\_Bdellovibrio  
g\_\_Mitsuokella  
f\_\_Comamonadaceae;\_\_  
p\_\_Firmicutes;\_\_;\_\_;\_\_  
g\_\_Defluviobacter  
g\_\_Enhydrobacter  
g\_\_Comamonas  
g\_\_Dialister  
c\_\_Alphaproteobacteria;\_\_;\_\_;\_\_  
g\_\_Bosea  
g\_\_Lactobacillus

g\_\_Alloprevotella  
p\_\_Proteobacteria;\_\_;\_\_;\_\_  
f\_\_Rhizobiaceae;\_\_  
o\_\_Burkholderiales;\_\_;\_\_  
g\_\_Campylobacter  
g\_\_Achromobacter  
g\_\_Ochrobactrum  
g\_\_Paracoccus  
g\_\_Corynebacterium  
g\_\_Bifidobacterium  
g\_\_Moraxella  
g\_\_Microbacterium  
g\_\_Bacillus  
f\_\_Neisseriaceae;\_\_  
g\_\_Saccharibacteria\_(TM7)\_[G-6]  
g\_\_Bacteroidales\_[G-2]  
g\_\_Butyrivibrio  
g\_\_Arthrospira  
g\_\_Lachnospiraceae\_[G-2]  
g\_\_Acinetobacter  
g\_\_Megasphaera  
g\_\_Cupriavidus  
g\_\_Micrococcus  
g\_\_Leptothrix  
g\_\_Peptostreptococcaceae\_[XI][G-9]  
g\_\_Lysinibacillus  
g\_\_Cutibacterium  
g\_\_Gemella  
g\_\_Leptotrichia  
c\_\_Betaproteobacteria;\_\_;\_\_;\_\_  
g\_\_Kingella  
g\_\_Roseomonas  
g\_\_Pedobacter  
c\_\_Gammaproteobacteria;\_\_;\_\_;\_\_  
g\_\_Sphingomonas  
g\_\_Actinomyces  
g\_\_Stenotrophomonas  
g\_\_Mesorhizobium  
g\_\_Capnocytophaga  
g\_\_Selenomonas  
o\_\_Rhizobiales;\_\_;\_\_  
f\_\_Bradyrhizobiaceae;\_\_  
f\_\_Enterobacteriaceae;\_\_  
g\_\_Fusobacterium  
k\_\_Bacteria;\_\_;\_\_;\_\_;\_\_  
g\_\_Brevundimonas  
g\_\_Staphylococcus  
g\_\_Porphyromonas  
c\_\_Actinobacteria;\_\_;\_\_;\_\_  
g\_\_Burkholderia  
g\_\_Agrobacterium  
g\_\_Haemophilus  
f\_\_Burkholderiaceae;\_\_  
g\_\_Bergeyella  
g\_\_Segetibacter  
g\_\_Prevotella  
g\_\_Veillonella

g\_\_Streptococcus  
g\_\_Rothia  
g\_\_Pseudomonas  
g\_\_Neisseria  
g\_\_Delftia  
c\_\_Negativicutes;\_\_;\_\_;  
g\_\_Klebsiella  
g\_\_Ralstonia

g = genus, c = class, f= family, o = order, p = phylum, k = kingdom

### *Examining potential batch effects*

As mentioned above, data curation and quality criteria were similar for all 30 RUNs.

After merging and curation was finalized, we created a PCoA plot of all samples per patient to see if some samples clustered by sequencing RUN. We were unable to see clustering according to sequencing RUN (Supplementary figure 4).

**Supplementary figure 4:** PCoA plots of three different beta diversity metrics (Bray-Curtis, weighted and unweighted UniFrac distances) for all samples from the 105 participants with exacerbation follow-up after rarefaction to a sampling depth of 1000, coloured according to sequencing run.

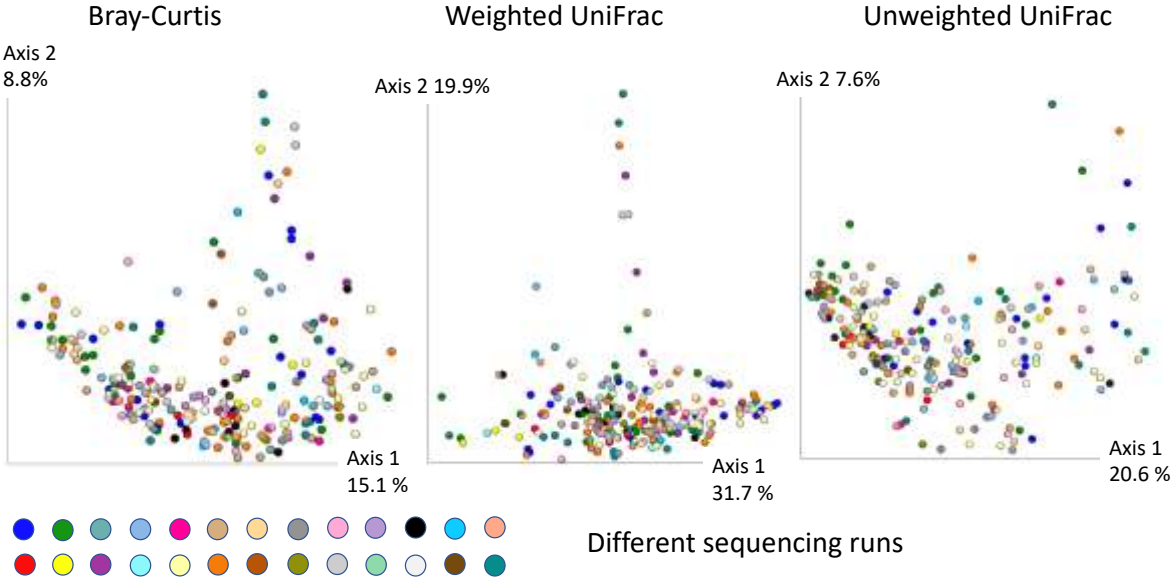

## Additional results

### *Differential abundance testing*

**Supplementary table 1.** Results from 4 different tests (ANCOM [4], gneiss [5], ALDEx2 [6], MicrobiomeDDA [7]) of differences in abundance of taxa, either at the ASV or genus level, between patients who did and did not experience one or more later COPD exacerbations.

| Test          | Sample type | Level                             | Taxonomic annotation of differentially expressed features:                                                         | Details                                                                                           |
|---------------|-------------|-----------------------------------|--------------------------------------------------------------------------------------------------------------------|---------------------------------------------------------------------------------------------------|
| ANCOM         | BAL         | ASV                               | No differentially abundant features                                                                                |                                                                                                   |
|               |             | Genus                             | No differentially abundant genera                                                                                  |                                                                                                   |
|               | rPSB        | ASV                               | No differentially abundant features                                                                                |                                                                                                   |
|               |             | Genus                             | No differentially abundant genera                                                                                  |                                                                                                   |
| gneiss        | BAL         | ASV                               | No significant balances                                                                                            |                                                                                                   |
|               | rPSB        | ASV                               | No significant balances                                                                                            |                                                                                                   |
| ALDEx2        | BAL         | ASV                               | No differentially abundant features                                                                                |                                                                                                   |
|               |             | Genus                             | No differentially abundant genera                                                                                  |                                                                                                   |
|               | rPSB        | ASV                               | No differentially abundant features                                                                                |                                                                                                   |
|               |             | Genus                             | No differentially abundant genera                                                                                  |                                                                                                   |
| MicrobiomeDDA | BAL         | ASV                               | No differentially expressed features                                                                               |                                                                                                   |
|               |             | Genus                             | No differentially expressed genera                                                                                 |                                                                                                   |
|               | rPSB        | ASV                               | <i>Capnocytophaga gingivitis</i><br>(more abundant, less prevalent and less dispersed in group with exacerbations) | abund.LFC: 1.693,<br>prev.change: -0.054<br>disp.LFC: -3.301<br>statistic: 20.035<br>P.adj: 0.011 |
|               |             | ASV                               | <i>Prevotella pallens</i><br>(less abundant, more prevalent and more dispersed in group with exacerbations)        | abund.LFC: -0.601<br>prev.change: 0.060<br>disp.LFC: 28.006<br>statistic: 15.627<br>P.adj: 0.041  |
|               | Genus       | No differentially abundant genera |                                                                                                                    |                                                                                                   |

Abund.LFC: log2-fold change in fitted mean abundance parameter between exacerbation and no-exacerbation group. Prev.change: linear difference in prevalence between exacerbation and no-exacerbation group. Disp.LFC: log2-fold change in fitted dispersion parameter between exacerbation and no-exacerbation group. Statistic: Value of likelihood ratio test statistic. Padj: p-value adjusted for multiple comparisons according to the FDR/BH method.

**Supplementary table 2.** Results from 4 different tests (ANCOM [4], gneiss [5], ALDEx2 [6], MicrobiomeDDA [7]) of differences in abundance of taxa, either at the ASV or genus level, between patients who had none or one and patients who experienced two or more later COPD exacerbations.

| Test          | Sample type                                                                                                                                                                                                                                                                                                                                                                                                                                                                             | Level                                                                                                          | Taxonomic annotation of differentially expressed features:                                                                      | Details                                                                                          |
|---------------|-----------------------------------------------------------------------------------------------------------------------------------------------------------------------------------------------------------------------------------------------------------------------------------------------------------------------------------------------------------------------------------------------------------------------------------------------------------------------------------------|----------------------------------------------------------------------------------------------------------------|---------------------------------------------------------------------------------------------------------------------------------|--------------------------------------------------------------------------------------------------|
| ANCOM         | BAL                                                                                                                                                                                                                                                                                                                                                                                                                                                                                     | ASV                                                                                                            | No differentially abundant features                                                                                             |                                                                                                  |
|               |                                                                                                                                                                                                                                                                                                                                                                                                                                                                                         | Genus                                                                                                          | No differentially abundant genera                                                                                               |                                                                                                  |
|               | rPSB                                                                                                                                                                                                                                                                                                                                                                                                                                                                                    | ASV                                                                                                            | No differentially abundant features                                                                                             |                                                                                                  |
|               |                                                                                                                                                                                                                                                                                                                                                                                                                                                                                         | Genus                                                                                                          | No differentially abundant genera                                                                                               |                                                                                                  |
| gneiss        | BAL                                                                                                                                                                                                                                                                                                                                                                                                                                                                                     | ASV                                                                                                            | No significant balances                                                                                                         |                                                                                                  |
|               | rPSB                                                                                                                                                                                                                                                                                                                                                                                                                                                                                    | ASV                                                                                                            | No significant balances                                                                                                         |                                                                                                  |
| ALDEx2        | BAL                                                                                                                                                                                                                                                                                                                                                                                                                                                                                     | ASV                                                                                                            | No differentially abundant features                                                                                             |                                                                                                  |
|               |                                                                                                                                                                                                                                                                                                                                                                                                                                                                                         | Genus                                                                                                          | No differentially abundant genera                                                                                               |                                                                                                  |
|               | rPSB                                                                                                                                                                                                                                                                                                                                                                                                                                                                                    | ASV                                                                                                            | No differentially abundant features                                                                                             |                                                                                                  |
|               |                                                                                                                                                                                                                                                                                                                                                                                                                                                                                         | Genus                                                                                                          | No differentially abundant genera                                                                                               |                                                                                                  |
| MicrobiomeDDA | BAL                                                                                                                                                                                                                                                                                                                                                                                                                                                                                     | ASV                                                                                                            | <i>Capnocytophaga leadbetteri</i><br>(less abundant, more prevalent and less dispersed in group with two or more exacerbations) | abund.LFC: -2.462<br>prev.change: 0.052<br>disp.LFC: -2.155<br>statistic: 24.360<br>P.adj: 0.008 |
|               |                                                                                                                                                                                                                                                                                                                                                                                                                                                                                         | ASV                                                                                                            | <i>Prevotella oris</i><br>(less abundant, more prevalent and more dispersed in group with two or more exacerbations)            | abund.LFC: -3.424<br>prev.change: 0.0004<br>disp.LFC: 1.826<br>statistic: 19.169<br>P.adj: 0.045 |
|               | Genus                                                                                                                                                                                                                                                                                                                                                                                                                                                                                   | <i>Moraxella</i><br>(less abundant, more prevalent and less dispersed in group with two or more exacerbations) | abund.LFC: 4.076<br>prev.change: 0.175<br>disp.LFC: 27.53<br>statistic: 18.215<br>P.adj: 0.026                                  |                                                                                                  |
|               | rPSB                                                                                                                                                                                                                                                                                                                                                                                                                                                                                    | ASV                                                                                                            | No differentially expressed features                                                                                            |                                                                                                  |
|               |                                                                                                                                                                                                                                                                                                                                                                                                                                                                                         | Genus                                                                                                          | No differentially expressed genera                                                                                              |                                                                                                  |
|               | <p>Abund.LFC: log<sub>2</sub>-fold change in fitted mean abundance parameter between exacerbation and no-exacerbation group. Prev.change: linear difference in prevalence between exacerbation and no-exacerbation group. Disp.LFC: log<sub>2</sub>-fold change in fitted dispersion parameter between exacerbation and no-exacerbation group. Statistic: Value of likelihood ratio test statistic. Padj: p-value adjusted for multiple comparisons according to the FDR/BH method.</p> |                                                                                                                |                                                                                                                                 |                                                                                                  |

**Supplementary table 3.** Results from 4 different tests (ANCOM, gneiss, ALDEx2, MicrobiomeDDA) of differences in abundance of taxa, either at the ASV or genus level, between COPD patients who used and did not use inhaled corticosteroids (ICS) at baseline.

| Test          | Sample type | Level | Taxonomic annotation of differentially expressed features: | Details |
|---------------|-------------|-------|------------------------------------------------------------|---------|
| ANCOM         | BAL         | ASV   | No differentially abundant features                        |         |
|               |             | Genus | No differentially abundant genera                          |         |
|               | rPSB        | ASV   | No differentially abundant features                        |         |
|               |             | Genus | No differentially abundant genera                          |         |
| gneiss        | BAL         | ASV   | No significant balances                                    |         |
|               | rPSB        | ASV   | No significant balances                                    |         |
| ALDEx2        | BAL         | ASV   | No differentially abundant features                        |         |
|               |             | Genus | No differentially abundant genera                          |         |
|               | rPSB        | ASV   | No differentially abundant features                        |         |
|               |             | Genus | No differentially abundant genera                          |         |
| MicrobiomeDDA | BAL         | ASV   | No differentially expressed features                       |         |
|               |             | Genus | No differentially expressed genera                         |         |
|               | rPSB        | ASV   | No differentially expressed features                       |         |
|               |             | Genus | No differentially expressed genera                         |         |

Abund.LFC: log<sub>2</sub>-fold change in fitted mean abundance parameter between ICS usage and no ICS usage group.  
 Prev.change: linear difference in prevalence between ICS usage and no ICS usage group. Disp.LFC: log<sub>2</sub>-fold change in fitted dispersion parameter between ICS usage and no ICS usage group.  
 Statistic: Value of likelihood ratio test statistic. Padj: p-value adjusted for multiple comparisons according to the FDR/BH method.

**Supplementary table 4.** Results from 4 different tests (ANCOM [4], gneiss [5], ALDEx2 [6], MicrobiomeDDA [7]) of differences in abundance of taxa, either at the ASV or genus level, between patients who did and did not experience one or more COPD exacerbations in the 12 months prior to the bronchoscopy.

| Test          | Sample type | Level | Taxonomic annotation of differentially expressed features:                                                                         | Details                                                                                          |
|---------------|-------------|-------|------------------------------------------------------------------------------------------------------------------------------------|--------------------------------------------------------------------------------------------------|
| ANCOM         | BAL         | ASV   | No differentially abundant features                                                                                                |                                                                                                  |
|               |             | Genus | No differentially abundant genera                                                                                                  |                                                                                                  |
|               | rPSB        | ASV   | No differentially abundant features                                                                                                |                                                                                                  |
|               |             | Genus | No differentially abundant genera                                                                                                  |                                                                                                  |
| gneiss        | BAL         | ASV   | No significant balances                                                                                                            |                                                                                                  |
|               | rPSB        | ASV   | No significant balances                                                                                                            |                                                                                                  |
| ALDEx2        | BAL         | ASV   | No differentially abundant features                                                                                                |                                                                                                  |
|               |             | Genus | No differentially abundant genera                                                                                                  |                                                                                                  |
|               | rPSB        | ASV   | No differentially abundant features                                                                                                |                                                                                                  |
|               |             | Genus | No differentially abundant genera                                                                                                  |                                                                                                  |
| MicrobiomeDDA | BAL         | ASV   | <i>Actinomyces graevenitzii</i><br>(less abundant, more prevalent and less dispersed in patients having experienced exacerbations) | abund.LFC: -1.513<br>prev.change: 0.028<br>disp.LFC: -0.618<br>statistic: 23.660<br>P.adj: 0.011 |
|               |             | Genus | No differentially expressed genera                                                                                                 |                                                                                                  |
|               | rPSB        | ASV   | No differentially expressed features                                                                                               |                                                                                                  |
|               |             | Genus | No differentially expressed genera                                                                                                 |                                                                                                  |

Abund.LFC: log<sub>2</sub>-fold change in fitted mean abundance parameter between exacerbation and no-exacerbation group. Prev.change: linear difference in prevalence between exacerbation and no-exacerbation group. Disp.LFC: log<sub>2</sub>-fold change in fitted dispersion parameter between exacerbation and no-exacerbation group. Statistic: Value of likelihood ratio test statistic. Padj: p-value adjusted for multiple comparisons according to the FDR/BH method.



*Diversity analyses*

**Supplementary figure 5:** Box plots of Faith phylogenetic alpha diversity (Faith PD) and Shannon Index alpha diversity in patients without compared with one or more later exacerbations in 60 bronchoalveolar lavage (BAL2) and 73 protected specimen brush samples (rPSB). Differences in diversity were tested with Kruskal-Wallis. There were no statistically significant associations.

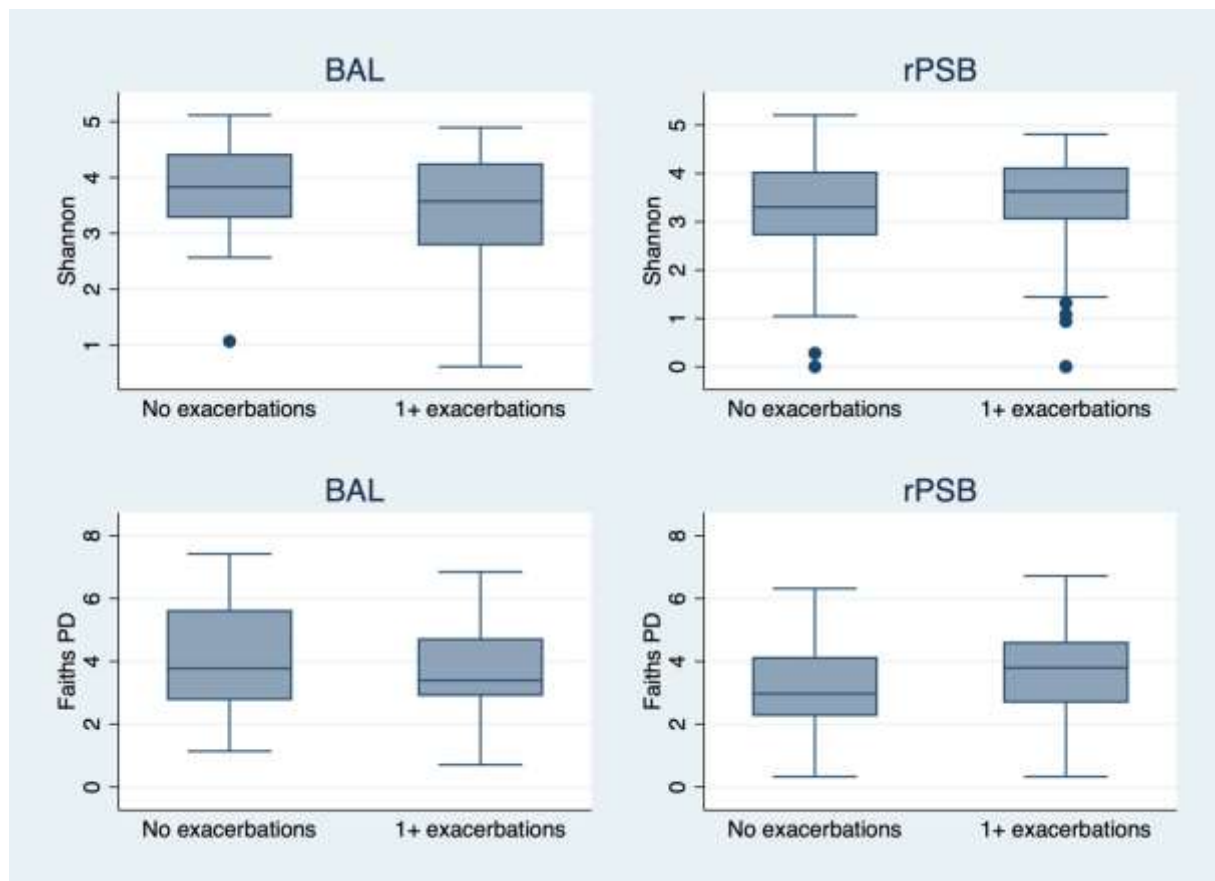

**Supplementary figure 6:** Box plots of Faith phylogenetic alpha diversity (Faith PD) and Shannon Index alpha diversity in patients zero or one compared with two or more later exacerbations in 60 bronchoalveolar lavage (BAL2) and 73 protected specimen brush samples (rPSB). Differences in diversity were tested with Kruskal-Wallis. There were no statistically significant associations.

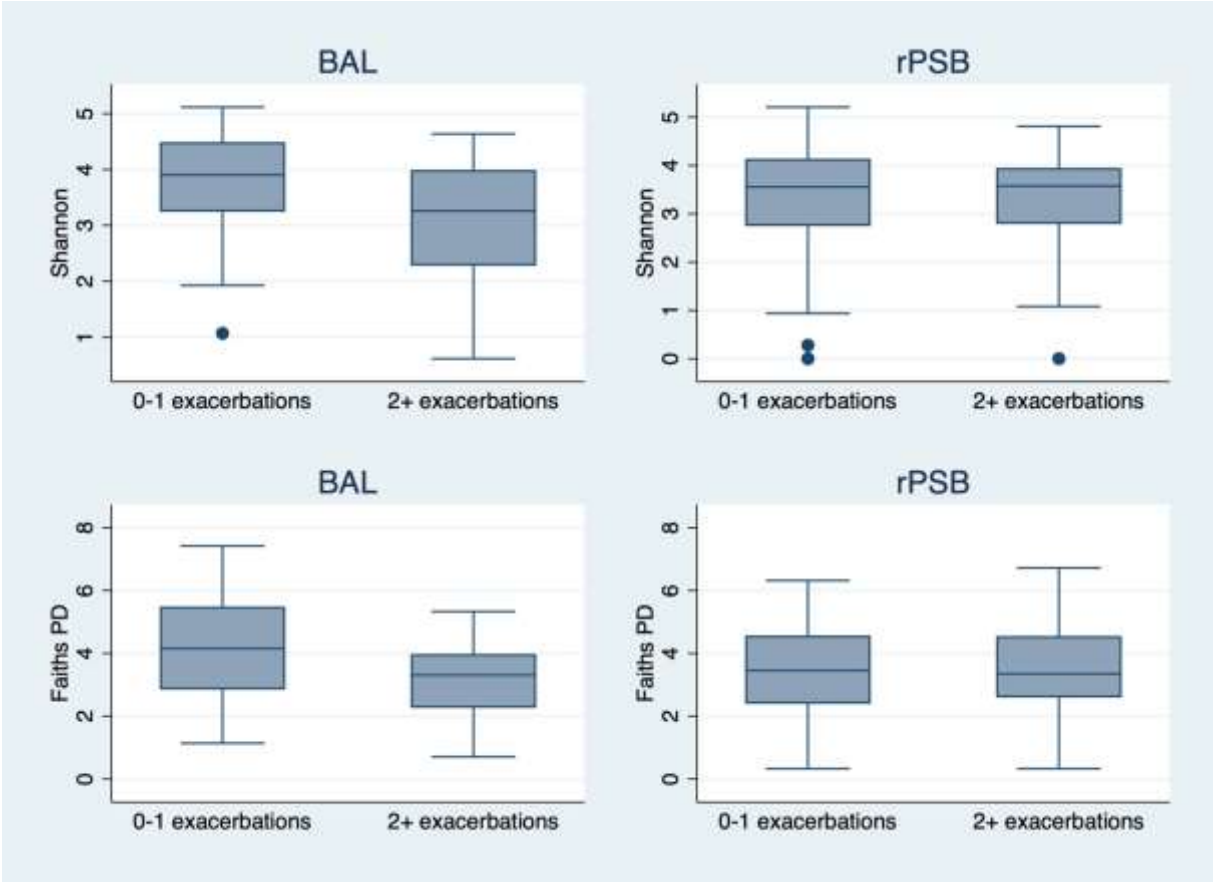

**Supplementary table 5.** Permutational multivariate analysis of variance (PERMANOVA [8]) of the beta-diversity (weighted UniFrac) by exacerbation category (zero versus one or more) without and with adjustment for age, sex, FEV<sub>1</sub> and use of inhaled steroids, in bronchoalveolar lavage samples and right protected specimen brush samples. Analysed with the vegan package in R.

| <i>Bronchoalveolar Lavage</i>         |    |                    |          |         |         |        |
|---------------------------------------|----|--------------------|----------|---------|---------|--------|
|                                       | Df | SumsOfSqs          | MeanSqs  | F.Model | R2      | Pr(>F) |
| Exacerbation category                 | 1  | 0.04811            | 0.048107 | 1.173   | 0.01982 | 0.287  |
| Residuals                             | 58 | 2.37876            | 0.041013 |         | 0.98018 |        |
|                                       | Df | SumsOfSqs          | MeanSqs  | F.Model | R2      | Pr(>F) |
| Exacerbation category                 | 1  | 0.04811            | 0.048107 | 1.15092 | 0.01982 | 0.324  |
| Age                                   | 1  | 0.01602            | 0.016016 | 0.38316 | 0.00660 | 0.898  |
| Sex                                   | 1  | 0.04037            | 0.040369 | 0.96578 | 0.01663 | 0.416  |
| FEV1 in percent predicted             | 1  | 0.02836            | 0.028357 | 0.67840 | 0.01168 | 0.618  |
| Inhaled steroid use                   | 1  | 0.03686            | 0.036863 | 0.88190 | 0.01519 | 0.507  |
| Residuals                             | 54 | 2.25715            | 0.041799 |         | 0.93007 |        |
| <i>right Protected Specimen Brush</i> |    |                    |          |         |         |        |
|                                       | Df | SumsOfSqs          | MeanSqs  | F.Model | R2      | Pr(>F) |
| Exacerbation category                 | 1  | 0.0518             | 0.051754 | 0.88513 | 0.01231 | 0.462  |
| Residuals                             | 71 | 4.1514             | 0.058470 |         | 0.98769 |        |
|                                       | Df | SumsOfSqs          | MeanSqs  | F.Model | R2      | Pr(>F) |
| Exacerbation category                 | 1  | 0.0518<br>0.051754 | 0.9192   | 0.01231 | 0.414   |        |
| Age                                   | 1  | 0.1884             | 0.188388 | 3.3458  | 0.04482 |        |
| Sex                                   | 1  | 0.0395             | 0.039534 | 0.7021  | 0.00941 | 0.589  |
| FEV1 in percent predicted             | 1  | 0.0834<br>0.083391 | 1.4810   | 0.01984 | 0.188   |        |
| Inhaled steroid use                   | 1  | 0.0676             | 0.067642 | 1.2014  | 0.01609 | 0.294  |
| Residuals                             | 67 | 3.7724             | 0.056305 |         | 0.89753 |        |

**Supplementary table 6.** Permutational multivariate analysis of variance (PERMANOVA [8]) of the beta-diversity (weighted UniFrac) by exacerbation category (zero or one versus two or more) without and with adjustment for age, sex, FEV<sub>1</sub> and use of inhaled steroids, in bronchoalveolar lavage samples and right protected specimen brush samples. Analysed with the vegan package in R.

| <i>Bronchoalveolar Lavage*</i>        |    |           |          |         |         |        |
|---------------------------------------|----|-----------|----------|---------|---------|--------|
|                                       | Df | SumsOfSqs | MeanSqs  | F.Model | R2      | Pr(>F) |
| Exacerbation category                 | 1  | 0.1078    | 0.107837 | 2.64261 | 0.04358 | 0.031  |
| Residuals                             | 58 | 2.3668    | 0.040807 |         | 0.95642 |        |
|                                       | Df | SumsOfSqs | MeanSqs  | F.Model | R2      | Pr(>F) |
| Exacerbation category                 | 1  | 0.1078    | 0.107837 | 2.59727 | 0.04358 | 0.031  |
| Age                                   | 1  | 0.0622    | 0.062161 | 1.49716 | 0.02512 | 0.172  |
| Sex                                   | 1  | 0.0199    | 0.019898 | 0.47925 | 0.00804 | 0.822  |
| FEV1 in percent predicted             | 1  | 0.0223    | 0.022272 | 0.53643 | 0.00900 | 0.763  |
| Inhaled steroid use                   | 1  | 0.0204    | 0.020431 | 0.49208 | 0.00826 | 0.800  |
| Residuals                             | 54 | 2.2420    | 0.041519 |         | 0.90601 |        |
| <i>right Protected Specimen Brush</i> |    |           |          |         |         |        |
|                                       | Df | SumsOfSqs | MeanSqs  | F.Model | R2      | Pr(>F) |
| Exacerbation category                 | 1  | 0.2154    | 0.215415 | 3.83368 | 0.05123 | 0.006  |
| Residuals                             | 71 | 3.9895    | 0.056190 |         | 0.94877 |        |
|                                       | Df | SumsOfSqs | MeanSqs  | F.Model | R2      | Pr(>F) |
| Exacerbation category                 | 1  | 0.2154    | 0.215415 | 3.85941 | 0.05123 | 0.007  |
| Age                                   | 1  | 0.0886    | 0.088620 | 1.58772 | 0.02108 | 0.169  |
| Sex                                   | 1  | 0.0263    | 0.026253 | 0.47036 | 0.00624 | 0.788  |
| FEV1 in percent predicted             | 1  | 0.0733    | 0.073289 | 1.31306 | 0.01743 | 0.248  |
| Inhaled steroid use                   | 1  | 0.0617    | 0.061702 | 1.10546 | 0.01467 | 0.329  |
| Residuals                             | 67 | 3.7396    | 0.055815 |         | 0.88935 |        |

\* For Bronchoalveolar lavage the dispersion was significant, and the results cannot be trusted, the results are shown only for consistency with supplementary table 5.

**Supplementary figure 7:** Principle Coordinate plots of beta diversity, measured by Bray Curtis distance in second fraction of bronchoalveolar lavage (BAL2), protected specimen brush (rPSB) and oral wash (OW) samples. Each sample is coloured according to exacerbation status (zero versus one or more) during follow-up.

## Beta diversity – Bray Curtis distance

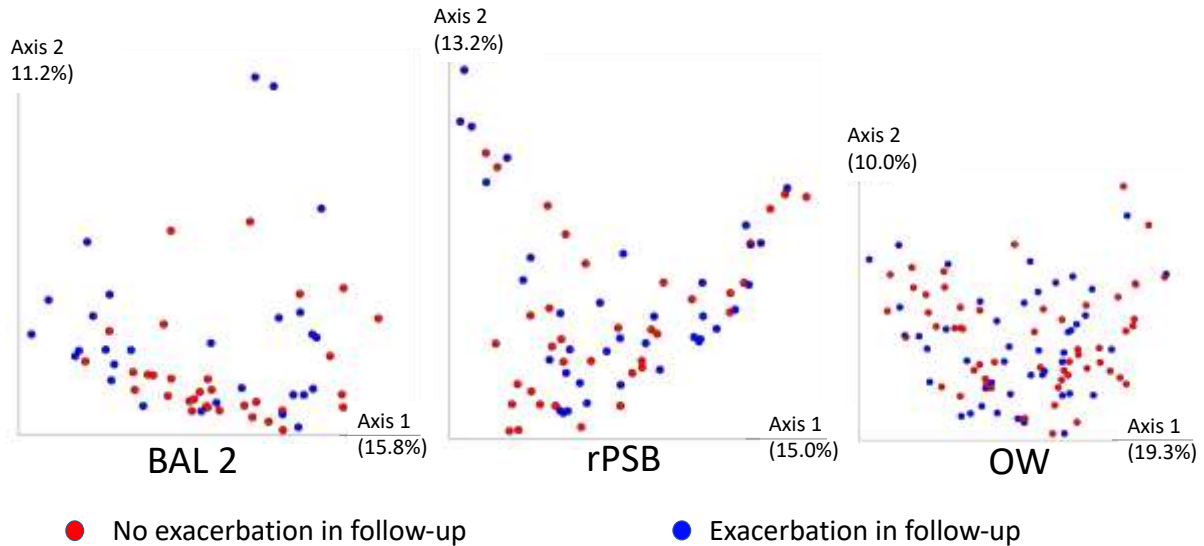

**Supplementary figure 8:** Principle Coordinate plots of beta diversity, measured by weighted UniFrac distance in second fraction of bronchoalveolar lavage (BAL2), protected specimen brush (rPSB) and oral wash (OW) samples. Each sample is coloured according to exacerbation status (zero versus one or more) during follow-up.

## Beta diversity – Weighted UniFrac distance

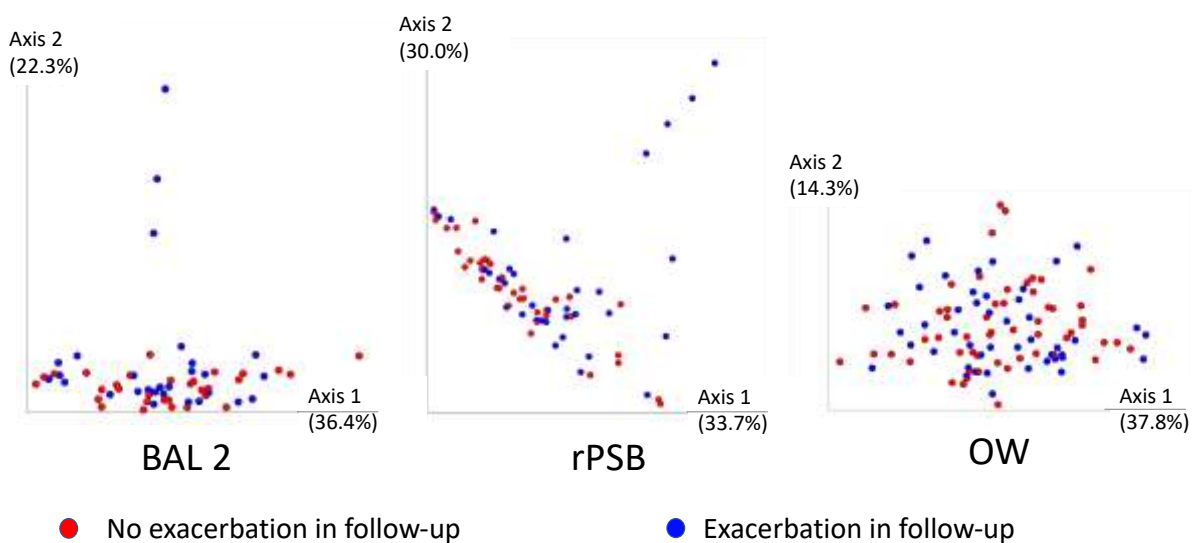

**Supplementary figure 9:** Beta diversity, measured by weighted UniFrac distance. Box plots of distances between groups with and without later exacerbations for each sample type; oral wash (OW), right protected specimen brushes (rPSB) and second fraction of bronchoalveolar lavage (BAL2). Differences between all groups were tested with the ADONIS permutation-based test. There were no statistically significant differences.

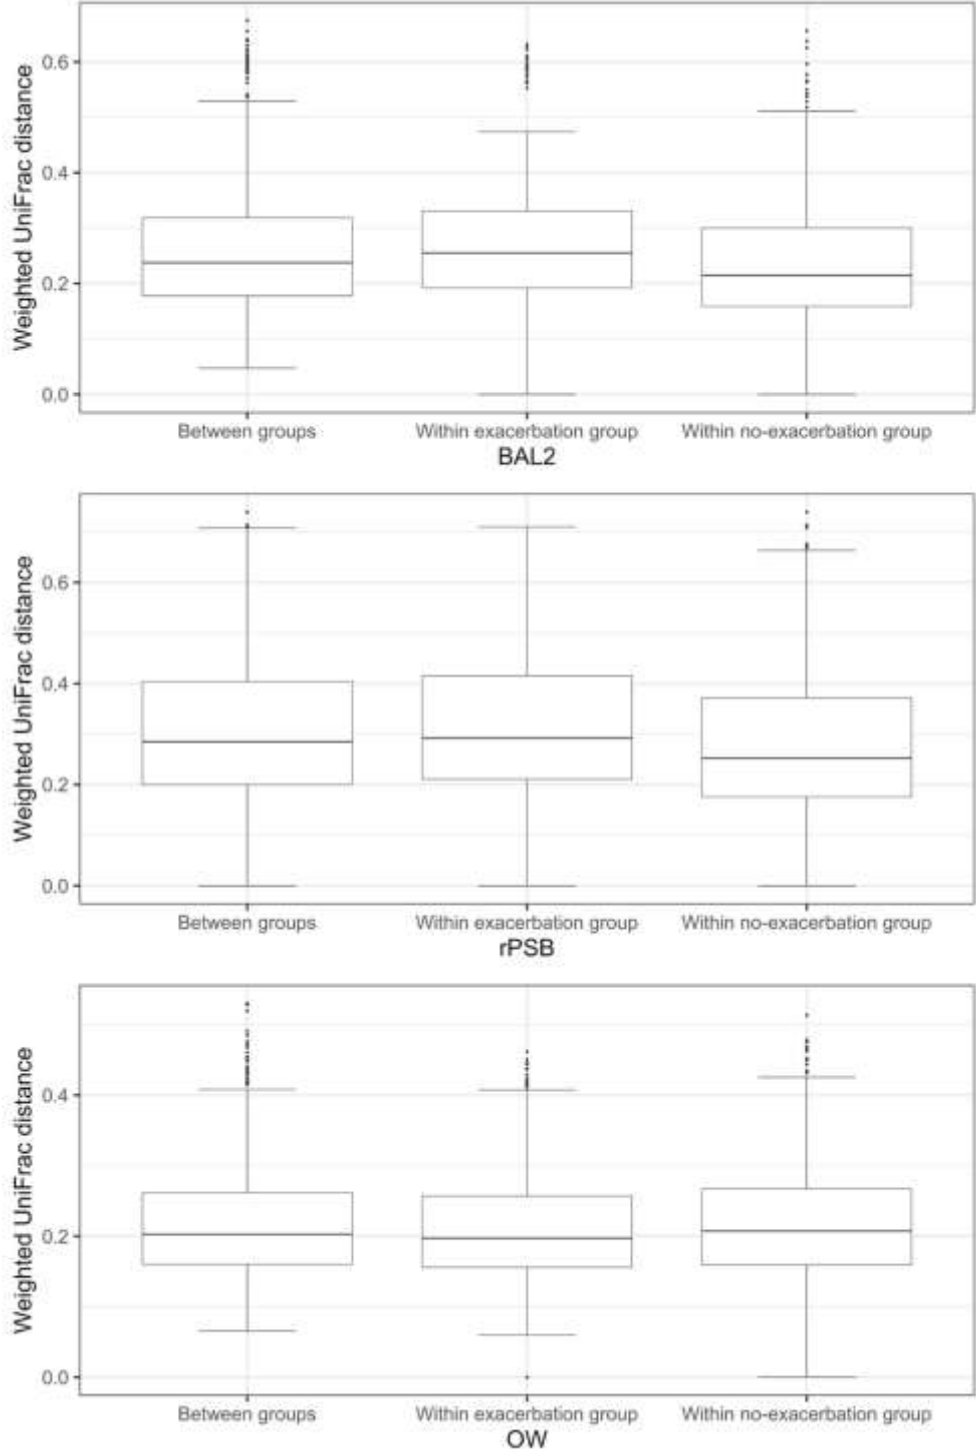

## References

1. Drengenes C, Wiker HG, Kalanathan T, Nordeide E, Eagan TML, Nielsen R. Laboratory contamination in airway microbiome studies. *BMC Microbiol* 2019; 19, 187.
2. Bolger AM, Lohse M, Usadel B. Trimmomatic: a flexible trimmer for Illumina sequence data. *Bioinformatics* 2014; 30, 2114-2120.
3. Davis NM, Proctor DM, Holmes SP, Relman DA, Callahan BJ. Simple statistical identification and removal of contaminant sequences in marker-gene and metagenomics data. *Microbiome* 2018; 6, 226.
4. Mandal, S 2015 Analysis of composition of microbiomes: a novel method for studying microbial composition. *Microb Ecol Health Dis* 2015; 26, 27663.
5. Morton JT, Sanders J, Quinn RA et al. Balance Trees Reveal Microbial Niche Differentiation. *mSystems* 2017; 2,
6. Fernandes, AD 2014 Unifying the analysis of high-throughput sequencing datasets: characterizing RNA-seq, 16S rRNA gene sequencing and selective growth experiments by compositional data analysis. 1805 21455 0
7. Chen J, King E, Deek R et al. An omnibus test for differential distribution analysis of microbiome sequencing data. *Bioinformatics* 2018; 34, 643-651.
8. Anderson MJ. A new method for non-parametric multivariate analysis of variance. *Austral ecology* 2001; 26, 32-46.
